Development 138, 3357-3366 (2011) doi:10.1242/dev.067942  
© 2011. Published by The Company of Biologists Ltd

# *no child left behind* encodes a novel chromatin factor required for germline stem cell maintenance in males but not females

Abbie L. Casper, Kelly Baxter and Mark Van Doren\*

## SUMMARY

Male and female germ cells follow distinct developmental paths with respect to germline stem cell (GSC) production and the types of differentiated progeny they produce (sperm versus egg). An essential aspect of germline development is how sexual identity is used to differentially regulate the male and female germ cell genomes to allow for these distinct outcomes. Here, we identify a gene, *no child left behind* (*nclb*), that plays very different roles in the male versus female germline in *Drosophila*. In particular, *nclb* is required for GSC maintenance in males, but not in females. Male GSCs mutant for *nclb* are rapidly lost from the niche, and begin to differentiate but cannot complete spermatogenesis. We further find that *nclb* encodes a member of a new family of conserved chromatin-associated proteins. NCLB interacts with chromatin in a specific manner and is associated with sites of active transcription. Thus, NCLB appears to be a novel chromatin regulator that exhibits very different effects on the male and female germ cell genomes.

**KEY WORDS:** *nclb*, Germline stem cells, Germline sexual identity, Chromatin, Epigenetics, *Drosophila*

## INTRODUCTION

An important aspect of germline development is how sexual identity is used to differentially regulate the male and female germ cell genomes to allow for sex-specific germ cell development. The *Drosophila* gonads have proven to be excellent systems for studying germ cell development and stem cell biology. Both males and females have germline stem cell populations that share many characteristics and are formed from a similar pool of primordial germ cells. However, they are also distinct cell types that can be distinguished based on gene expression and cell biological characteristics, as well as the behavior of their differentiating progeny (Dansereau and Lasko, 2008). To what extent male and female germline stem cells differ from one another and how germline sex determination leads to these differences are key issues in germ cell development.

In addition to the germline stem cells (GSCs), adult testes and ovaries contain somatic stem cells and, together, these stem cells produce progeny that differentiate to form spermatogenic or oogenic cysts (Fuller, 1993; Fuller and Spradling, 2007; Spradling, 1993). In the testis, the GSCs and somatic stem cells (cyst stem cells, CySCs) are found at the apical end of the testis in close association with a somatic structure known as the 'hub'. The hub acts as a signaling center to regulate stem cell maintenance and division through both the JAK/STAT and TGF $\beta$  pathways (Kawase et al., 2004; Kiger et al., 2001; Schulz et al., 2004; Shivdasani and Ingham, 2003; Tulina and Matunis, 2001). The hub also physically anchors the stem cells and regulates the orientation of GSC division (Yamashita et al., 2003). As GSC progeny begin to differentiate into gonidia, they associate with somatic cyst cells and divide to

produce a cyst of 16 interconnected cells that undergo meiosis to form sperm. In the female, GSCs are found within each ovariole of the ovary. These cells lie adjacent to the cap cells and terminal filament cells, which play an analogous role to the hub to physically anchor the GSCs and signal through the JAK/STAT and TGF $\beta$  pathways (Decotto and Spradling, 2005; Song and Xie, 2002; Xie and Spradling, 1998). As GSC progeny enter differentiation, they first associate with escort cells but then associate with the follicle cells to create egg-forming units known as egg chambers. The follicle cells are produced from follicle stem cells located more distally in the first region of the ovariole (Decotto and Spradling, 2005; Nystul and Spradling, 2007). As in the male, the differentiating germ cells will divide to produce a cyst of interconnected cells, but only one will commit to meiosis and become the oocyte, while the others become nurse cells.

During development, the gonad initially forms as the germ cells associate with somatic gonadal precursors (SGPs) and coalesce into the embryonic gonads (Dansereau and Lasko, 2008). At the time of gonad formation, sex-specific gene expression is observed in the SGPs and the germ cells, indicating that sexual identity has been established in both of these cell types (Camara et al., 2008; Casper and Van Doren, 2006). In the male, the hub forms by the end of embryogenesis (24 hours AEL) (Le Bras and Van Doren, 2006), and a subset of germ cells takes on the characteristics of adult GSCs at this time (Sheng et al., 2009). Spermatogenesis begins by the first instar larval period (Aboim, 1945), as evidenced by the expression of the germline differentiation marker Bag of Marbles and the formation of interconnected cysts (Sheng et al., 2009). In females, both the germ cells and the SGPs have sex-specific identity in the embryo (Casper and Van Doren, 2009), but morphogenesis of the ovary does not begin until the larval stages (King, 1970), and cells are not thought to take on GSC identity until the larval/pupal transition (5 days AEL) (Zhu and Xie, 2003). Little is known about how sex-specific germ cell development is regulated to create the differences in male versus female GSC development and behavior.

Biology Department, Johns Hopkins University, Baltimore, MD 21218, USA.

\*Author for correspondence (vandoren@jhu.edu)

Accepted 2 June 2011

To identify genes important for germline sexual development, we conducted an in situ hybridization screen for genes expressed sex specifically in embryonic germ cells (Casper and Van Doren, 2009). Such genes may be involved in regulating germline sexual identity, or may reflect differences in the timing of male versus female germline development, such as in the establishment of GSCs. Here, we report the study of one of these genes, *no child left behind* (*nclb*). We find that *nclb* is required in males for both GSC maintenance and early stages of germ cell differentiation. By contrast, *nclb* is not required in female GSCs and only acts to regulate later aspects of germ cell differentiation. Interestingly, *nclb* encodes a highly conserved protein of previously unknown function, and we demonstrate that NCLB is a chromatin-associated factor that regulates transcription. Thus, NCLB is a putative epigenetic regulator of GSC maintenance in the testis and reveals important differences in how the male versus female GSCs are controlled.

## MATERIALS AND METHODS

### Fly stocks

Oregon-R and precise excision of *nclb*<sup>EY10712</sup> (as wild types), P(Dfd-lacZ-HZ2.7) on X (W. McGinnis, UCSD, CA, USA), *tubulin-GAL4-LL7*, *nanos-GAL4-VP16* (Van Doren et al., 1998), *paired-GAL4*, *nclb*<sup>EY10712</sup>, *nclb*<sup>EY15483</sup>, Df(2R)Exel6059, Df(2R)27 and UASp-*nclb*. Unspecified fly stocks are from Bloomington Stock Center. *nclb*<sup>EY10712</sup> is inserted into the 5'UTR, 45 bp from the start of transcription. *nclb*<sup>1</sup> and *nclb*<sup>2</sup> excisions from *nclb*<sup>EY10712</sup> were characterized by assaying lethality, PCR, sequencing and western blots (see Fig. S1 in the supplementary material). The *nclb*<sup>2</sup> excision deletes an upstream gene *CG30016*, which does not cause the lethality or germ cell defects as *CG30016*<sup>02466/nclb</sup> flies are both viable and fertile.

For creating mutant GSC clones, 0- to 2-day-old male and female flies were heatshocked twice for 45 minutes at 37°C with 1 hour of recovery at 25°C in between. Flies of the following genotypes were mated to create the clones hsFLP;FRT42B: *armlacZ/cyo* × FRT42B *nclb*<sup>2</sup>/*cyo* or FRT42B +/FRT42B+.

### Antibodies, RNA and DNA probes

Antibodies used are as follows (dilution, source): mouse anti-EYA 10H6 (1:25, DSHB; N. Bonini, University of Pennsylvania, Philadelphia, PA, USA), rabbit anti-NCLB [1:1000 (gonads), 1:400 (polytenes), 1:10,000 (westerns), M.V.D.], guinea pig anti-NCLB [1:1000 (gonads), 1:10,000 (westerns), M.V.D.], Su(Hw) (1:200, V. Corces, Emory University, Atlanta, GA, USA), mouse anti-Pol I<sup>ser2</sup> H5 (1:50, Covance), mouse anti-Pol I<sup>ser5</sup> H14 (1:50, Covance), rat anti-CP190 (1:20,000, V. Corces), rat anti-BAM (1:100, D. McKearin, University of Texas Southwestern Medical Center, Dallas TX, USA), mouse anti-GFP B-2 (1:50, Santa Cruz), rabbit anti-GFP (1:2000, Torrey Pines Biolabs), rat anti-DN-cadherin Ex#8 (1:20, DSHB; T. Uemura, Kyoto University, Japan), chick anti-VASA (1:10,000, K. Howard, UCL, London, UK), rabbit anti-VASA (1:10,000, R. Lehmann, Skirball Institute, NY, USA), rabbit anti-STAT92E (1:1000, S. Hou, NCI, Frederick, MD, USA), mouse anti-β-GAL (1:10,000, Promega), rabbit anti-β-GAL (1:10,000, Cappel), mouse anti-Fasciclin 3 7G10 (1:30, DSHB; C. Goodman, UC Berkeley, CA, USA), mouse anti-α-spectrin 3A9 [1:2, DSHB; D. Branton (University of Minnesota, Minneapolis, MN, USA) and R. Dubreuil (University of Illinois, Chicago, IL, USA)], mouse anti-γ-TUBULIN (1:100, Sigma), rat anti-E-cadherin (1:4, DSHB), rabbit anti-ZFH-1 (1:1000, Ruth Lehmann), rabbit anti-H3pSer10 (1:1000 Upstate Biotechnologies), rabbit anti-H3 (1:1000, Upstate Biotechnologies) and AP-conjugated sheep anti-digoxigenin (1:2000, Roche). Fluorescently conjugated secondary antibodies were used at 1:500 (Molecular Probes, Rockland Scientific, Amersham Pharmacia Biotech) or 1:400 (Jackson Laboratories). HRP-conjugated secondary antibody (Jackson ImmunoResearch Laboratories). DAPI (1 μg/ml, Sigma), Hoechst (1 μg/ml, Invitrogen) and OliGreen (1:10,000, Molecular Probes) were used to detect DNA.

The antisense RNA probes for *CG6751* were synthesized by digesting clone LD21021 with *SacI* (NEB) and transcribed with T7 RNA polymerase (Promega) using digoxigenin-labeled UTP (Boehringer-Mannheim).

A DNA probe for Hsp70 was amplified from genomic DNA using the following pair of primers: Hsp70 IIIA (5'-TGGTGCTGACCAAGATGAAG-3') and Hsp70 IIIB (5'-TAGTCTGCTTGACCGAATG-3').

### In situ hybridization, immunostaining and western blots

Adult testes, ovaries and L3 gonads were dissected in PBS and fixed in 0.1% Triton-X and PBS with 4.5% formaldehyde for 30 minutes and immunostained as previously described (Gönczy et al., 1997). L2 posterior ends were pulled off before fixing and gonads dissected during mounting. Embryos were fixed, devitellinized and immunostained as described previously (Patel, 1994) with modifications (Le Bras and Van Doren, 2006). Whole-mount in situ hybridization on embryos were performed as previously described (Lehmann and Tautz, 1994). Salivary gland polytene chromosomes were dissected from wandering third instar larvae. For heat-shock experiments, larvae were heat-shocked at 37°C for 20 minutes and dissected within 5 minutes. DNA in situ hybridization on polytenes was performed as described previously (Ivaldi et al., 2007). The glands for immunostaining were transferred to 45% acetic acid for 30 seconds, then transferred to a drop of 1:2:3 fixative (one volume of lactic acid, two volumes of water and three volumes glacial acetic acid) on a siliconized cover slip. The glands were fixed for 2 minutes in 45% acetic acid or dissected and only fixed for 2 minutes in 120 μl of paraformaldehyde (3.7%) and 120 μl of absolute acetic acid. Next, all were squashed and frozen in liquid nitrogen. All stainings were mounted in VectaShield (Vector Laboratories) or 2.5% DABCO (Sigma) in 70% glycerol. All were visualized by Zeiss Axioskop or Zeiss 510 LSM confocal microscope. Whole-larvae extracts were used for westerns conducted as described previously (Ivaldi et al., 2007).

## RESULTS

### *no child left behind* (*nclb*) is required for male GSC maintenance

We identified *CG6751* due to its male-specific expression in the embryonic gonad (Fig. 1A,B). Previous analysis indicated that *CG6751* expression in the male gonad is germ cell specific and is controlled both autonomously by the chromosomal content of the germline and nonautonomously by sex-specific signals from the surrounding somatic cells (Casper and Van Doren, 2009). Our analysis of a P-element allele (*CG6751*<sup>EY10712</sup>) revealed that it was adult viable, but males were sterile and females exhibited only limited fertility (data not shown). *CG6751*<sup>EY10712</sup> mutant adult testes exhibited a reduced number of germ cells and the absence of mature sperm (Fig. 1E). Owing to the defects in fertility and germline development associated with *CG6751*, we named this gene *no child left behind* (*nclb*).

As the *nclb*<sup>EY10712</sup> P element is inserted into the 5'UTR and did not behave as a null allele, new alleles were created through P-element excision. Two imprecise excision alleles, *nclb*<sup>1</sup> and *nclb*<sup>2</sup>, exhibited stronger phenotypes than the original *nclb*<sup>EY10712</sup> allele (Fig. 1F,G). *nclb*<sup>1</sup> was found to contain an internal deletion in the P-element, and is adult viable and male and female sterile. We found that *nclb*<sup>2</sup> contains a 2170 bp deletion that removes the entire *nclb*-coding region (see Fig. S1 in the supplementary material), and is homozygous lethal at the late larval stage. *nclb*<sup>2</sup> homozygous mutant larvae were found to be smaller in size than heterozygous siblings and failed to enter pupariation; in rare cases, *nclb*<sup>2</sup> mutant larvae lived to 9 or 10 days of age without forming pupae. Precise excisions of the EY10712 P-element were also generated as controls and animals homozygous for the precise excisions exhibited no defects in growth, gonad development or adult gonad function (e.g., Fig. 1D, Fig. 4A). In addition, we observed that the

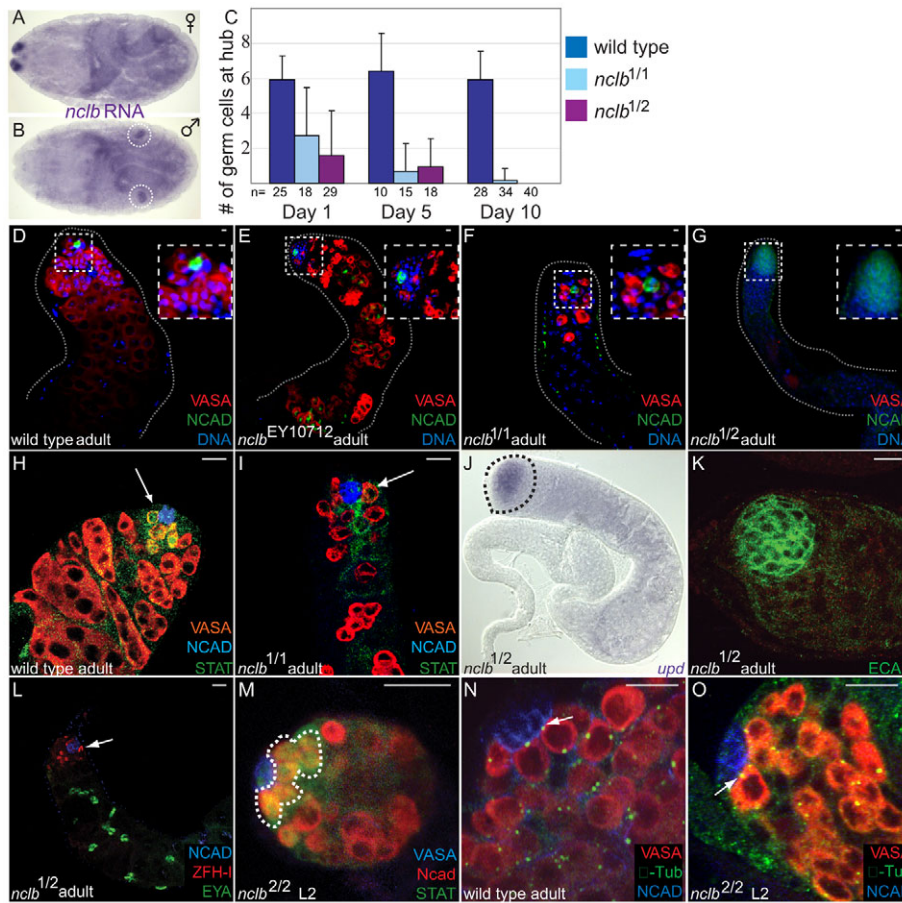

**Fig. 1. *nclb* is required for male GSC maintenance.** (A,B) In situ hybridization in stage 17 embryos reveals that *nclb* is expressed in male gonads and not female gonads. Staining in A is paternal X marker. Gonads are circled in B. (C) *nclb* mutants exhibit a reduced number of germline cells proximal to the hub compared with wild type (all wild type in this figure are a precise excision allele of EY10712). (D-G) Five-day-old adult testes immunostained for germ cells (VASA, red), hub cells (NCAD, green) and DNA (DAPI, blue). Note that *nclb* mutant testes exhibit germline loss relative to wild type that is more severe in stronger loss-of-function *nclb* mutants (e.g. G). (H,I) Newly eclosed adult testes immunostained for germ cells (VASA, red), hub cells (NCAD, blue) and STAT92E (anti-STAT92E, green). Germ cells adjacent to the hub (arrows) in *nclb* mutant testes do not exhibit anti-STAT 92E immunoreactivity. (J) Adult *nclb* mutant testis labeled by in situ hybridization for *upd*. Outline indicates apical end of testis. (K) *nclb* mutant adult testis immunostained for DE-cadherin (green). Note that the hub is also enlarged in *nclb* mutants. (L) *nclb* mutant adult testis immunolabeled for cyst stem cells (anti-ZFH-1, red, arrow), late somatic cyst cells (anti-EYA, green) and the hub (anti-NCAD, blue). Arrow indicates cyst stem cell. (M) Immunostaining of STAT92E (outline) is restricted to GSC in larval *nclb* mutant testis. (N,O) Centrosomes visualized with  $\gamma$ -tubulin antibody (green, arrows) are properly oriented in *nclb* mutant L2 larval testis (O), similar to wild-type adult (N) and larvae (not shown). Scale bars: 10  $\mu$ m.

adult testis phenotype of *nclb*<sup>1</sup>/*Df* is similar to that of *nclb*<sup>1/2</sup> (see Fig. S1C in the supplementary material). Therefore, we conclude that the mutant phenotype of our imprecise excision alleles are not due to other lesions on the parental chromosome.

The phenotype of *nclb* mutant testes indicated that germ cells were failing to behave properly as GSCs and to properly differentiate into sperm. We first investigated the germ cells associated with the hub, which would normally act as GSCs in wild-type testes. Using viable *nclb* alleles, we found that testes from newly eclosed adults had fewer hub-proximal germ cells compared with wild type, and further reduction was seen at days 5 and 10 (Fig. 1C). Male GSCs receive a signal from the hub that activates the JAK/STAT pathway (Kiger et al., 2001; Tulina and Matunis, 2001) and leads to upregulation of STAT92E protein levels (Fig. 1H). Germ cells adjacent to the hub in young adult *nclb* mutant testes failed to exhibit STAT92E expression, indicating that they are not behaving properly as GSCs (Fig. 1I).

The loss of GSCs does not appear to be due to defects in the surrounding niche environment, as we still observed expression of the *upd* ligand for the JAK/STAT pathway in the hub (Fig. 1J). In addition, the adhesion molecules DE- and DN-cadherin, which are thought to be important for hub-GSC interaction, were also still seen in the hub (Fig. 1G,K). The hub often appeared expanded in *nclb* mutants (Fig. 1J,K), which is characteristic of the hub in the absence of proper hub-GSC interaction (Gönczy and DiNardo, 1996; Kitadate et al., 2007). Finally, the cyst stem cells that also associate with the hub and are essential for maintaining the GSCs (Leatherman and DiNardo, 2008) were still observed in *nclb* mutants (anti-ZFH1, Fig. 1L). These data indicate that the lack of STAT92E activation in the hub-proximal germ cells, and the failure of these cells to behave as GSCs, is not likely to be due to defects in the niche environment.

We next examined earlier stages in testis development. We have found that the hub forms by the end of embryogenesis (Le Bras and Van Doren, 2006), and the hub-proximal germ cells already behave

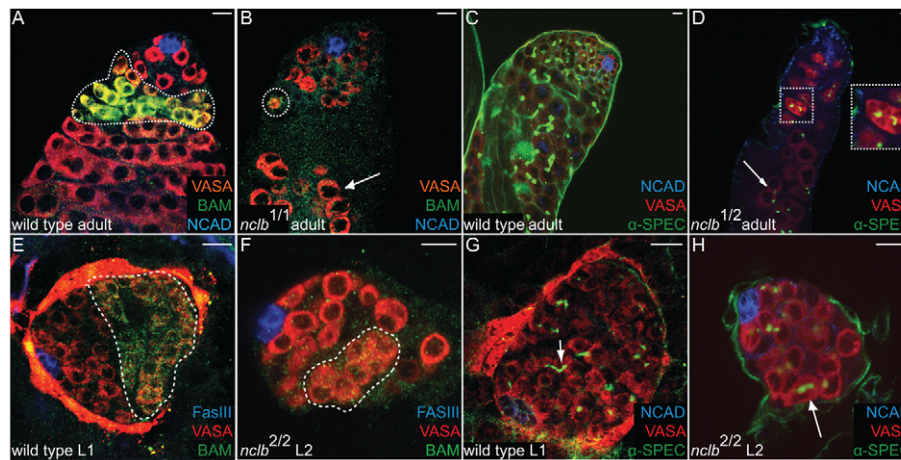

**Fig. 2. *nclb* mutant male germ cells initiate differentiation but do not progress in spermatogenesis.** Genotypes and antibodies used are as indicated on panels; all wild type in this figure are a precise excision allele of EY10712. (A, B) Adult testes immunostained for the differentiation marker BAM (anti-BAM, green). Dotted outline indicates BAM expression in wild-type cysts (A) and in initial cysts in *nclb* mutants (B). (C, D) Adult testes immunostained to reveal the fusome (anti-spectrin, green). Note that small cysts in *nclb* mutants still produce branched fusomes characteristic of differentiating spermatogonia (dashed outline). Inset is a higher magnification of this region. Arrow in D indicates larger germ cells that do not have branched fusomes. (E, F) Larval testes immunostained with the differentiation marker BAM (anti-BAM, green). *nclb*-null mutant larval germ cells form initial cysts that express BAM similar to wild-type cysts (broken outlines). (G, H) Larval testes immunostained to reveal the fusome (anti-spectrin, green). Note that *nclb*-null larval testis form cysts with interconnected branched fusomes (arrow in H). Scale bars: 10  $\mu$ m.

as GSCs by the first instar larval period (Sheng et al., 2009). In *nclb*-null mutants, a subset of germ cells still associated with the hub during larval stages and exhibited STAT92E expression (Fig. 1M), characteristic of wild-type GSCs. Furthermore, these hub-proximal germ cells correctly localized one of their centrosomes to the hub-germ cell interface, again similar to wild-type GSCs (Fig. 1O) (Sheng et al., 2009; Yamashita et al., 2003). Finally, we found that *nclb* mutant germ cells could still exhibit the proper pattern of male-specific germ cell gene expression, based on a number of male-specific genes we have characterized (Casper and Van Doren, 2009) (see Fig. S2 in the supplementary material). We conclude that, in *nclb*-null mutants, germ cells still establish a male sexual identity and transition normally to become male GSCs. However, these GSCs are not properly maintained in the testis. The initially normal behavior of male germ cells in *nclb*-null mutants may indicate that *nclb* is not required for GSC establishment, or may be due to maternally contributed NCLB protein (Fig. 5C; see Fig. S1D in the supplementary material).

### ***nclb* mutant male germ cells begin to differentiate but cannot complete spermatogenesis**

We failed to find mature sperm in *nclb* mutants, indicating that there is also a defect in spermatogenesis. To determine whether *nclb* mutant germ cells enter differentiation, we examined expression of Bag of Marbles (BAM), which is expressed in differentiating spermatogenic cysts (McKearin and Spradling, 1990) (Fig. 2A). In *nclb* mutant adult testis, we observed multicellular cysts (four to eight cells) that express BAM (Fig. 2B), but cysts beyond four to eight cells were not observed. We also examined fusome formation and observed multicellular cysts with branched fusomes between cells (Fig. 2D, inset). Fewer differentiating cysts were observed in *nclb* mutants than in wild type and, as older cysts were not observed, this indicates that cysts degenerate after the four- to eight-cell stage. However, we did not observe increased expression of markers of apoptosis (activated

caspase) in *nclb* mutant testes (data not shown). A few large germ cells were observed further from the hub, but these contained only round fusome material that did not extend between germ cells, indicating that any germ cells that had progressed to this stage were no longer part of cysts and were developing abnormally (Fig. 2D, arrow). Somatic cyst cells do appear to be able to differentiate in *nclb* mutants, as EYA-positive cyst cells were still observed distal to the hub (Fig. 1L).

We also examined the onset of spermatogenesis during larval stages in *nclb*-null mutants. Again we saw that *nclb* mutants could form small cysts that expressed BAM (Fig. 2F) and contained branched fusomes (Fig. 2H), but cysts older than this stage were not observed. We conclude that in *nclb* mutant testes, germ cells can enter differentiation but spermatogenic cysts cannot develop normally.

### ***nclb* is required in the germline**

We next wanted to determine whether the function of *nclb* in the testis is autonomous to the germline. We first addressed this by driving UASp-*nclb* expression in a cell type-specific manner. Expression of *nclb* specifically in the germline (*nanos*-VP16-GAL4) was sufficient to rescue the germline loss phenotype observed in *nclb*<sup>1/2</sup> mutants (Fig. 3A). Rescued testes had a wild-type appearance, with numerous GSCs associated with the hub and ample numbers of differentiating spermatogenic cysts. In addition, these rescued males had elongated spermatids and were completely fertile (Fig. 3A, arrow; see Table S1 in the supplementary material). Expression of *nclb* achieved using a general *tubulin*-Gal4 driver was also able to rescue the germline and fertility defects in *nclb*<sup>1/2</sup> mutants (Fig. 3B; see Table S1 in the supplementary material), but was no more effective than germline-specific expression. These data indicate that the testis defect observed in *nclb* mutants is due to loss of *nclb* specifically in the germline. Expression of *nclb* using *tubulin*-Gal4 was also sufficient to rescue the lethality of *nclb*<sup>2/2</sup>-null mutants (see Table S1 in the supplementary material).

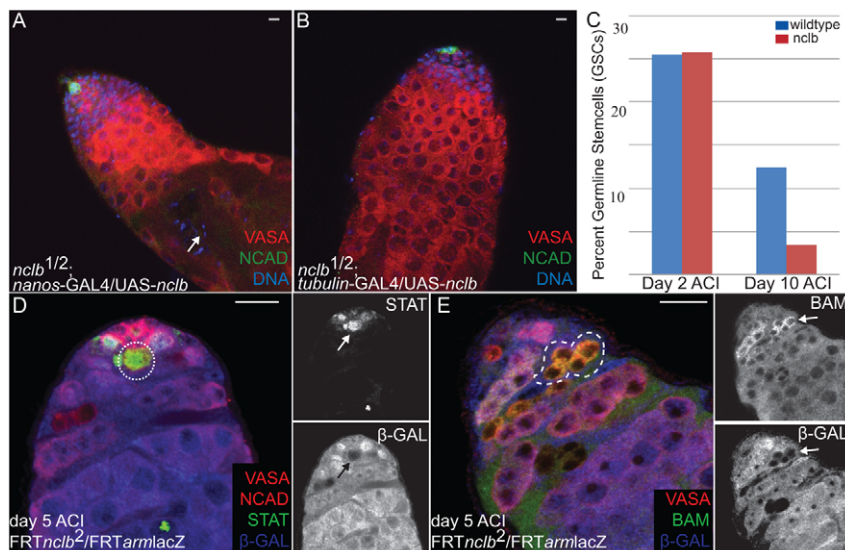

**Fig. 3. *nclb* is autonomously required in the germline.** (A,B,D,E) Immunostaining of adult testes. Antibodies used and genotypes are indicated on each panel. (A,B) Five-day-old *nclb* mutant testes show complete rescue of germline defects when UAS-*nclb* is expressed specifically in the (A) germline (*nanos*-GAL4) or (B) broadly (*tubulin*-GAL4). Compare with Fig. 1G. Arrow in A indicates elongated sperm. (C) FLP/FRT induction of wild-type versus *nclb* homozygous mutant GSCs. Graph indicates the percentage of testes with labeled wild-type or *nclb* mutant GSCs at the indicated times ACI. *nclb* mutant GSCs are lost at a higher frequency than wild-type GSCs. (D,E) FLP/FRT induced *nclb*-null mutant germ cells, as indicated by loss of  $\beta$ -Galactosidase expression (anti- $\beta$ -gal, blue). (D) *nclb*-null mutant GSCs (broken outline and arrow) still exhibit increased STAT immunoreactivity (green) similar to wild-type GSCs. (E) *nclb*-null mutant germline cysts (broken outline and arrows) still exhibit BAM expression characteristic of differentiating cysts. Scale bars: 10  $\mu$ m.

Fertility was not rescued in these animals, presumably because *tubulin*-Gal4 is less active in the germline compared with the soma (A.L.C., K.B. and M.V.D., unpublished).

We next conducted the reciprocal experiment where we removed *nclb* function from germ cells by making germline clones with our *nclb*<sup>2</sup>-null mutant allele using the FLP/FRT system (Golic and Lindquist, 1989). We found that *nclb* mutant GSCs were present in similar numbers to wild-type control clones 2 days after clone induction (ACI) [wild type, 25.5% (*n*=51); *nclb*, 25.8% (*n*=93), Fig. 3C]. However, by 10 days ACI, the number of testes with *nclb* mutant GSCs was dramatically reduced relative to wild-type control clones [wild type 12.5% (*n*=96); *nclb*, 3.4% (*n*=118)]. Unlike what we observed in *nclb* homozygous mutant adults (Fig. 1I), *nclb*-null mutant germ cells adjacent to the hub still exhibited upregulation of STAT92E (Fig. 3D), even 5 days ACI. However, we also observed that NCLB protein was still present in these clones, indicating a strong perdurance of the protein. Thus, those GSCs that are still present 5 days ACI may be those GSCs that retain sufficient NCLB and can still respond to STAT. Despite the perdurance of NCLB protein, the clear GSC loss phenotype leads us to conclude that *nclb* is required in GSCs for their maintenance.

We also examined the fate of *nclb*-null mutant germline clones further from the hub. We found that *nclb* mutant germ cells could form multicellular cysts that expressed BAM, but that these did not progress beyond the four- to eight-cell stage (Fig. 3E). Thus, *nclb* mutant germ cells are able to enter differentiation even many days after generating null mutant GSC clones. We conclude that *nclb* is not required for viability of male GSCs, but is required for proper GSC maintenance and for germ cell cysts to complete spermatogenesis once they have initiated differentiation.

***nclb* is required in females for germ cell differentiation but not for GSC maintenance**

Next, we examined the ovaries of *nclb* mutants. Unlike what was observed in testes, ovaries from 5-day-old *nclb*<sup>1</sup>/*nclb*<sup>2</sup> mutant adults contained ample germline and exhibited clear signs of egg chamber development (Fig. 4B); however, some germline loss was observed in 10-15 day old females. In newly eclosed females, a few mature eggs were observed, which probably account for the limited fertility of these females. However, most of the egg chambers were arrested around stage 5 of development (Fig. 4B). When nurse cells

endoreplicate and become polyploid, the five major chromosome arms form individual territories in the nuclei that can be observed by DNA staining (the ‘5 blob’ stage) (Dej and Spradling, 1999). Subsequently, the nurse cell chromatin becomes more uniformly distributed in the nucleus (Fig. 4C). In *nclb* mutants, the nurse cell chromatin remained in the ‘five blob’ configuration (Fig. 4D). Thus, egg chamber development arrests approximately at stage 5, and this may represent defects in nurse cell chromatin organization as this phenotype has been previously observed for chromatin regulators [e.g. Su(Hw)] (Harrison et al., 1993).

To investigate whether *nclb* is required in the germline or the soma, we first attempted to rescue *nclb* mutant females with tissue-specific expression of UASp-*nclb*. Expression in the germline (*nanos*-Gal-VP16) failed to rescue the stage 5 egg chamber arrest or fertility defects (Fig. 4E; see Table S1 in the supplementary material). More general expression using *tubulin*-Gal4, which expresses more strongly in the soma than in the germline, also failed to completely rescue the five blob phenotype but did partially rescue fertility (Fig. 4F; see Table S1 in the supplementary material). Expression with *daughterless*-Gal4, which expresses strongly in both the germline and the soma (Cronmiller and Cline, 1987), was sufficient to rescue both the egg chamber arrest and fertility defects of *nclb* mutants (Fig. 4G; see Table S1 in the supplementary material). We next examined the phenotype of null *nclb* mutant germline clones. We did not observe any difference in the number of *nclb* mutant GSC clones compared with control clones even 15 days ACI (see Table S2 in the supplementary material). Unlike what was observed in males, we did not see significant perdurance of the NCLB protein in *nclb* mutant female GSC clones; NCLB immunoreactivity was dramatically reduced or absent in *nclb* mutant GSCs as early as 5 days ACI. Thus, *nclb* is not required in the germline for female GSC maintenance. In *nclb* mutant clones, we did observe the same ‘five blob’ egg chamber arrest phenotype observed in *nclb* hypomorphic adult females (Fig. 4H). We conclude that *nclb* is required in the female germline for germ cell differentiation and egg chamber development, but not for GSC maintenance.

Last, we examined null *nclb* mutant follicle cells in the ovary. Two days ACI, we observed small groups of *nclb*-mutant follicle cells that appeared to contribute normally to the follicle cell epithelium (Fig. 4I). Mutant follicle cells were still observed in

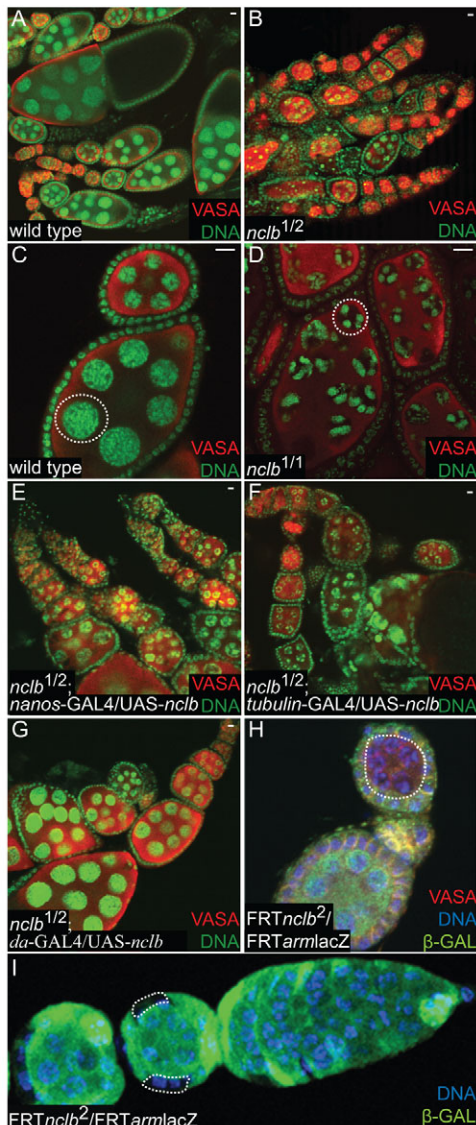

**Fig. 4. *nclb* affects only late stages of germ cell differentiation in females.** (A–G) Five-day-old mated female ovaries immunostained for germ cells (anti-VASA, red) and DNA (green). Genotypes as indicated in individual panels. All wild type in this figure are a precise excision allele of EY10712. (A–D) *nclb* mutant ovaries show ample germline and normal early cyst and egg chamber development. *nclb* mutant egg chambers arrest with a ‘five blob’ chromatin structure (dashed outline, D). (E–G) *nclb* mutants expressing UAS-*nclb* in combination with various Gal4 ‘drivers’. The egg chamber arrest phenotype is rescued only when *nclb* is expressed strongly in both the germline and soma (*da*-Gal4, G). (H,I) *nclb* homozygous null mutant cells generated using the FLP/FRT system. (H) *nclb*-null mutant germ cells (dashed outline) are able to form normal cysts and early egg chambers, but arrest with the same ‘five blob’ chromatin phenotype as hypomorphic mutants. (I) *nclb* null mutant follicle cells contribute to the follicular epithelium (dashed outlines), but large clones of mutant follicle cells indicative of mutant follicle stem cells are not observed. Scale bars: 10  $\mu$ m.

older egg chambers at later timepoints; however, the overall number of follicle cell clones decreased dramatically over time (see Table S2 in the supplementary material). In particular, egg chambers containing large regions of mutant follicle cells, which

are indicative of mutant follicle stem cells, were not observed. We conclude that *nclb* is not required in differentiated follicle cells, but is required in follicle stem cells for their survival or maintenance.

### NCLB is a member of a new family of chromatin proteins

*nclb* encodes a protein with a predicted nuclear localization signal and four WD40 repeats, and shows extensive homology to predicted proteins in other species (Fig. 5A). Little is known about this family of proteins, but the yeast homolog (PWP1) has been shown to associate with chromatin in a manner dependent on the N-terminal tail of Histone H4 (Suka et al., 2006). In addition, the human homolog, endonuclein, has been shown to localize to the nucleus (Honore et al., 2002). Using polyclonal antisera raised against the full-length protein, we observed NCLB immunoreactivity localized to the nucleus in a broad range of embryonic cell types, including in the germ cells (Fig. 5B). Immunoreactivity was greatly reduced in *nclb*<sup>2</sup> mutant embryos (Fig. 5C; see Fig. S1B in the supplementary material). This allele lacks the entire *nclb*-coding region, and the residual staining is likely to be due to maternally contributed protein as it was observed with two independent anti-NCLB antibodies. NCLB immunoreactivity was observed in the germline of the adult testes (Fig. 5D,D') and ovary (Fig. 5E,E'). NCLB was also observed in the somatic cells of the ovary (Fig. 5E,E') and in ZFH-1-positive cyst cells in the testis, but is absent from differentiated EYA-positive cyst cells (see Fig. S3 in the supplementary material).

Given that PWP1 can associate with chromatin, we next wanted to determine whether NCLB is a chromatin-associated protein. We analyzed the larval salivary gland polytene chromosomes, where many copies of each individual chromosome are aligned allowing for direct visualization of proteins bound to chromatin. NCLB exhibited a highly specific pattern of localization, with regions of intense NCLB staining along with many more regions of weaker staining (Fig. 5F,F'). NCLB staining colocalized with regions of weak DAPI staining (‘interbands’), indicating that it binds to regions of open chromatin, rather than to regions that are condensed. In addition, NCLB was observed labeling chromosomal ‘puffs’ (e.g. arrow in Fig. 5F,F'), which are indicative of active transcription. We conclude that NCLB is a nuclear protein that can interact with chromatin in a specific manner.

### NCLB is associated with sites of active transcription

During transcriptional initiation, RNA polymerase II (RNA Pol II) is first phosphorylated on the serine 5 position of its C-terminal domain and then becomes phosphorylated on serine 2 as it transitions to transcriptional elongation (Gilmour, 2009). We observed that NCLB immunoreactivity colocalized in many places with RNA Pol II phospho-serine 5 (Fig. 6A), and that the colocalization was even more extensive with RNA Pol II phospho-serine 2 (Fig. 6B). Although there were also sites of NCLB localization that did not correlate with activated forms of RNA Pol II, overall these data indicate that NCLB is localized at sites of active transcription. Consistent with this, we found that *nclb* is required for proper levels of active transcription. During the transition from transcriptional initiation to elongation, Histone H3 becomes phosphorylated on residue serine 10 (Ivaldi et al., 2007). Although Histone H3 is also phosphorylated on this residue during mitosis, the relatively small percentage of dividing cells in larvae suggests that this can be used as an indicator of active transcription. In *nclb* mutant larvae, we observed a dramatic decrease in serine

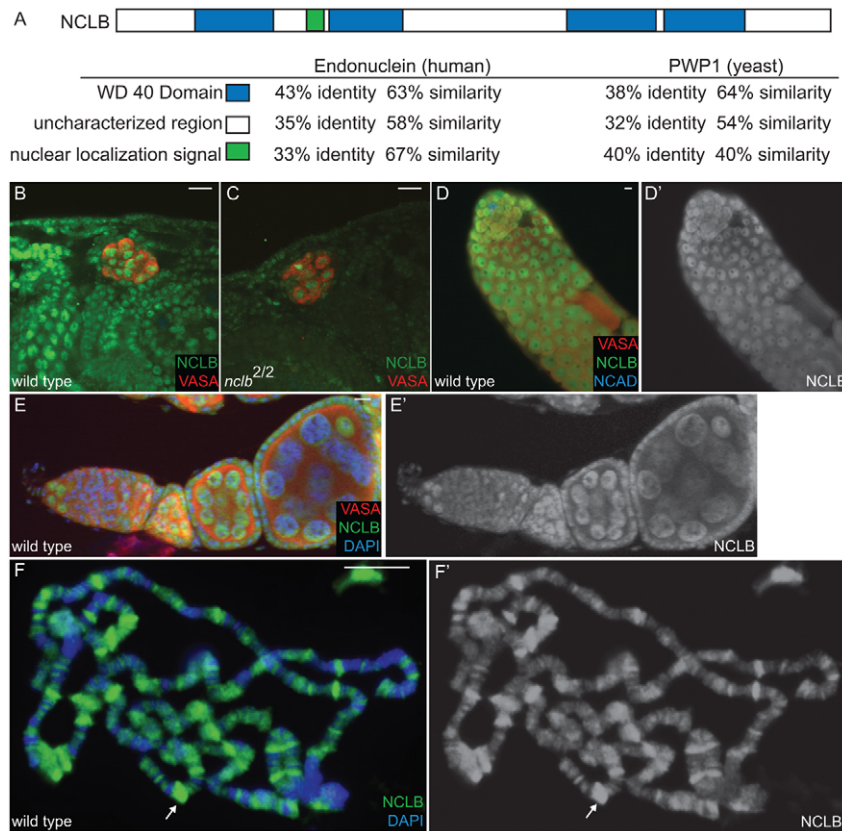

**Fig. 5. NCLB is a chromatin-associated protein.**

(A) The NCLB predicted protein contains WD40 repeats (blue) and a nuclear localization signal (green), and shows extensive homology to human (endonuclein) and yeast (PWP1). (B-F') Immunostaining using a polyclonal anti-NCLB antibody (green). Genotypes and other antibodies used are as shown on individual panels. (B) NCLB immunoreactivity is observed in the nucleus of many embryonic cell types, including the germ cells (anti-VASA, red). (C) Anti-NCLB immunoreactivity is greatly reduced in *nclb*-null mutant embryos, indicating the specificity of the antisera. Residual staining may reflect maternal protein. (D-E') Anti-NCLB immunoreactivity is observed in the germline of the adult testis (D,D'), and in both the germline and the soma in the ovary (E,E'). (F,F') anti-NCLB immunostaining of third instar larval polytene chromosomes. Arrow indicates a 'puff' or area of active transcription. Scale bars: 10 μm.

10 phosphorylated H3, relative to the total H3 (Fig. 6C). Thus, we conclude that the total amount of active transcription is decreased in *nclb* mutants.

To examine the relationship between NCLB and active transcription, we took advantage of the heat shock response. After a brief heat shock, transcription is repressed throughout most of the genome, whereas it is rapidly activated at specific heat shock loci that produce stress response genes (Spradling et al., 1975). Prior to heat shock, we found that NCLB was not present at the *hsp70 87C* locus (Fig. 6C, arrow). The *hsp70 87A* locus exhibited a small amount of NCLB staining; however, this locus has previously been shown to stain for marks of active transcription prior to heat shock (Ivaldi et al., 2007), which is probably due to the activity of a nearby, non-heat shock gene. After heat shock, both the 87A and 87C loci exhibited robust NCLB staining, along with the characteristic 'puff' morphology of the DNA that is indicative of active transcription (Fig. 6D). NCLB staining was also observed at other chromosomal locations, both before and after heat shock (Fig. 6C,D). Therefore, NCLB recruitment to the heat shock loci correlates with the active transcription of the heat shock genes, but NCLB was not lost from other regions of the genome that are repressed after heat shock.

**DISCUSSION**

***nclb* is essential for germline development**

Our work indicates that *nclb* is essential for several different aspects of germ cell development. Within the testis, *nclb* is required autonomously in the germline for GSC maintenance and germ cell differentiation. *nclb* hypomorphic mutant adult testes show a progressive loss of GSCs and *nclb*-null mutant GSCs are lost from the niche at a much higher rate than wild-type GSCs. *nclb* mutant GSCs begin to differentiate, as they form multicellular cysts that

have branched fusomes and express the differentiation marker BAM; however, differentiation is blocked soon after this stage. Germ cells that remain localized near the hub in *nclb* homozygous mutant adult testis do not respond appropriately to hub signals; no increase in STAT92E immunoreactivity is observed in these cells. However, we also do not observe precocious differentiation of these hub-associated germ cells, as premature BAM expression and branched fusome formation is not observed. Recently, it has been shown that JAK/STAT signaling in the GSCs is important for adhesion to the hub, but not for repression of differentiation (Leatherman and Dinardo, 2010). Instead, it is the association of the GSCs with neighboring cyst stem cells that maintains their undifferentiated state. Thus, *nclb* mutant germ cells may be lost from the niche due to decreased JAK/STAT response and therefore decreased adhesion to the hub. However, they must still be able to respond at least partly to signals from the cyst stem cells that inhibit differentiation.

Interestingly, we find that *nclb* is not required for GSC maintenance in females. In contrast to what we saw in males, we observed no difference in the maintenance of *nclb*-null mutant GSCs in the ovary, compared with wild-type GSCs. We did observe defects in a later step of female germ cell differentiation in *nclb* mutants, where egg chambers arrest prior to a reorganization of the nurse cell chromatin. This is consistent with NCLB playing a role in chromatin organization, and other chromatin factors exhibit a similar nurse cell chromatin phenotype (Harrison et al., 1993). Our data also reveal a stronger requirement for *nclb* in the somatic cells in the female, as germline expression was insufficient for rescuing mutant females and *nclb* is also required for follicle stem cell maintenance. Thus, although *nclb* is expressed in many cell types in the embryo and the gonad, different cell types have very different requirements for *nclb* function.

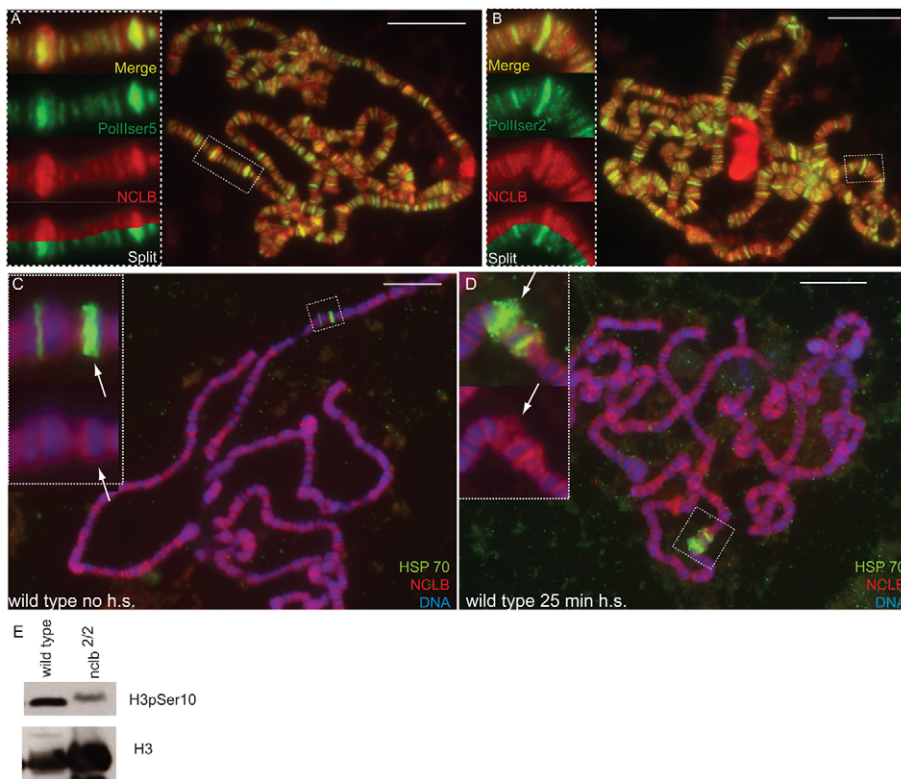

**Fig. 6. NCLB colocalizes with active RNA polymerase and facilitates active transcription.** (A,B) Third instar larval polytene chromosomes immunostained to reveal NCLB (anti-NCLB, red) and active forms of RNA polymerase II (green). There are many positions where NCLB colocalizes with RNA polymerase II phosphorylated at serine 5 (A) and RNA polymerase II phosphorylated at serine 2 (B). Insets show the boxed region at a higher magnification, and with the channels merged and split to reveal opposing sides of the polytene chromosome. (C,D) Third instar larval polytene chromosomes labeled by fluorescent in situ hybridization to reveal the *Hsp70* loci (green) and anti-NCLB (red). Insets show a higher magnification of the boxed region, arrows indicate the *Hsp70* 87C locus. NCLB is not observed at the *Hsp70* loci prior to heat shock (C), but is present at the puffed *Hsp70* loci after heat shock (D). Scale bars: 10  $\mu$ m. (E) Western blot of third instar larval protein extracts probed with antibodies that recognize all Histone H3, or Histone H3 phosphorylated on serine 10.

### NCLB identifies a new family of chromatin factors

Our data indicate that NCLB is a chromatin-associated factor that binds predominantly to regions of the genome that are transcriptionally active. By examining the salivary gland polytene chromosomes, we find that NCLB colocalizes with active forms of RNA polymerase II. We also observed NCLB localized to polytene chromosome ‘puffs’, which are sites of active transcription (Fig. 5F), and NCLB is recruited to the heat shock loci specifically upon their activation. Last, in *nclb* mutants, we observed a decrease in a phosphorylated form of histone H3 that is associated with active transcription. Thus, NCLB is associated with chromatin in a specific and dynamic manner that correlates with, and appears to be required for, active transcription.

Homology searches reveal single putative orthologs for NCLB in diverse eukaryotic species, including humans and yeast, with homology extending throughout the NCLB predicted protein sequence. Thus, it is likely that NCLB homologs in other species share a role as chromatin factors. This is supported by previous finding that yeast Pwp1p can associate with chromatin in a manner dependent on the N-terminal tail of Histone H4 (Suka et al., 2006). In that work, Pwp1p was found to associate with the rDNA loci; however, a global analysis of Pwp1p binding to chromatin was not conducted. Analogous with our work with NCLB, we propose that Pwp1p and other homologs are likely to more broadly regulate expression of a variety of targets, many of which will be RNA polymerase II targets.

The homology between NCLB/Pwp1 family members includes both the predicted WD40 repeats and intervening regions. WD40 repeats are protein-protein interaction domains commonly found in chromatin-associated proteins, and have been shown to interact directly with modified histones. For example, WD40 Repeat Domain Protein 5 (WDR5) interacts with Histone H3 methylated on lysine 4 and can promote gene expression (Wysocka et al.,

2006). Thus, it is likely that NCLB is recruited to chromatin via its WD40 repeats, possibly by directly binding to modified histones. Alternatively, WD40 repeat proteins can also be recruited to chromatin by directly binding to modified DNA or non-coding RNAs (Scrima et al., 2008; Wang et al., 2011). Interestingly, WDR5 has also been implicated in a common pathway with the important chromatin remodeling complex NURF (Wysocka et al., 2006). Like NCLB, NURF has been shown to be important for regulation of both male GSC maintenance (Cherry and Matunis, 2010) and sperm differentiation (Kwon et al., 2009) in *Drosophila*. Another feature common to both *nclb* mutants and mutants for NURF complex components is a failure to pupate (this work) (Badenhorst et al., 2005), indicating a defect in ecdysone response. Thus, NCLB may act by influencing NURF complex activity. The molecular mechanism by which NCLB influences transcriptional activity in vivo, and what other aspects of gene expression and chromatin structure NCLB might regulate, are interesting directions for future research.

### Epigenetic regulation of germ cell sexual development

The epigenetic regulation of germ cell development is of particular interest, as the germline must undergo many specific developmental transitions yet must ultimately retain totipotency. Given that NCLB appears to be an important chromatin regulator, the study of *nclb* can reveal important aspects of the epigenetic regulation of the germline. One important transition in the germline involves germ cell sex determination, where germ cells take on a male or female identity. Germ cell sexual identity is influenced both by factors acting autonomously in the germline, but also by influences from the surrounding soma (Casper and Van Doren, 2006; Hempel et al., 2008). We see clear differences between the sexes in the role of NCLB in the germline. In males, *nclb* is



required for GSC maintenance, but this is not the case in females. This indicates that, even though these two types of stem cells are highly similar in many ways, they are regulated differently at the chromatin level. The male and female germline also exhibit different requirements for *nclb* during differentiation. In males, germline cysts arrest early in spermatogenesis, while female cysts form normal egg chambers that arrest only later in development. The early defect in male germline differentiation may be linked to the requirement for *nclb* in male GSCs, as the chromatin state of the GSC is also the starting point for any epigenetic changes that accompany differentiation. One difference between male and female GSCs is their requirement for signaling through the JAK/STAT pathway. The JAK/STAT pathway regulates male germline identity early in development (Wawersik et al., 2005). In the adult, JAK/STAT signaling is present in both the male and female GSCs niches, but this pathway is required only in GSCs in males (Kiger et al., 2001; Tulina and Matunis, 2001) and not in females (Decotto and Spradling, 2005). As already discussed, *nclb* mutant male GSCs are defective in their ability to respond to JAK/STAT signaling from the hub, which may contribute to why *nclb* is required in male GSCs but not in female GSCs.

The role of *nclb* emphasizes how even closely related stem cell types, such as male and female GSCs, are subject to very different epigenetic regulation. Much of the work on regulation of stem cells has focused on principles that stem cells have in common, such as the need to maintain an undifferentiated state (e.g. Pietersen and van Lohuizen, 2008). Indeed, the requirement for chromatin factors such as Imitation Switch is similar in male and female GSCs (Ables and Drummond-Barbosa, 2010; Cherry and Matunis, 2010; Xi and Xie, 2005), and it is possible to find epigenetic regulators that affect a variety of adult stem cell types (Buszczak et al., 2009). However, it is equally clear that adult stem cells in vivo have different potentials, and normally give rise to very different types of differentiated progeny. Although the male and female GSCs are closely related stem cells that share a common origin, the progeny to which they give rise, sperm versus egg and nurse cells, are clearly very different. Thus, the differences in epigenetic regulation of male and female GSCs may prove as interesting as their similarities.

#### Acknowledgments

We are grateful to numerous colleagues for supplying reagents, as indicated specifically in the Materials and methods. We also very much appreciate the contribution of essential repositories of reagents and information, including FlyBase, the Drosophila Genomic Resources Center, the Developmental Studies Hybridoma Bank and the Bloomington Drosophila Stock Center. We thank many colleagues for discussions and advice on the manuscript, including Soledad Ivaldi and members of the Van Doren lab. This work was supported by NIH grant GM084356 to M.V.D. Deposited in PMC for release after 12 months.

#### Competing interests statement

The authors declare no competing financial interests.

#### Supplementary material

Supplementary material for this article is available at <http://dev.biologists.org/lookup/suppl/doi:10.1242/dev.067942/-DC1>

#### References

- Ables, E. T. and Drummond-Barbosa, D. (2010). The steroid hormone ecdysone functions with intrinsic chromatin remodeling factors to control female germline stem cells in *Drosophila*. *Cell Stem Cell* **7**, 581-592.
- Aboim, A. N. (1945). Développement embryonnaire et post-embryonnaire des gonades normales et agamétiques de *Drosophila melanogaster*. *Rev. Suisse Zool.* **52**, 53-154.
- Badenhorst, P., Xiao, H., Cherbas, L., Kwon, S. Y., Voas, M., Rebay, I., Cherbas, P. and Wu, C. (2005). The *Drosophila* nucleosome remodeling factor NURF is required for Ecdysteroid signaling and metamorphosis. *Genes Dev.* **19**, 2540-2545.
- Buszczak, M., Paterno, S. and Spradling, A. C. (2009). *Drosophila* stem cells share a common requirement for the histone H2B ubiquitin protease scrawny. *Science* **323**, 248-251.
- Camara, N., Whitworth, C. and Van Doren, M. (2008). The creation of sexual dimorphism in the *Drosophila* soma. *Curr. Top. Dev. Biol.* **83**, 65-107.
- Casper, A. and Van Doren, M. (2006). The control of sexual identity in the *Drosophila* germline. *Development* **133**, 2783-2791.
- Casper, A. L. and Van Doren, M. (2009). The establishment of sexual identity in the *Drosophila* germline. *Development* **136**, 3821-3830.
- Cherry, C. M. and Matunis, E. L. (2010). Epigenetic regulation of stem cell maintenance in the *Drosophila* testis via the nucleosome-remodeling factor NURF. *Cell Stem Cell* **6**, 557-567.
- Cronmiller, C. and Cline, T. W. (1987). The *Drosophila* sex determination gene *daughterless* has different functions in the germ line versus the soma. *Cell* **48**, 479-487.
- Dansereau, D. A. and Lasko, P. (2008). The development of germline stem cells in *Drosophila*. *Methods Mol. Biol.* **450**, 3-26.
- Decotto, E. and Spradling, A. C. (2005). The *Drosophila* ovarian and testis stem cell niches: similar somatic stem cells and signals. *Dev. Cell* **9**, 501-510.
- Dej, K. J. and Spradling, A. C. (1999). The endocycle controls nurse cell polytene chromosome structure during *Drosophila* oogenesis. *Development* **126**, 293-303.
- Fuller, M. (1993). Spermatogenesis. In *The Development of Drosophila melanogaster*, Vol. 1 (ed. M. Bate and A. Martinez Arias), pp. 71-147. Cold Spring Harbor: Cold Spring Harbor Press.
- Fuller, M. T. and Spradling, A. C. (2007). Male and female *Drosophila* germline stem cells: two versions of immortality. *Science* **316**, 402-404.
- Gilmour, D. S. (2009). Promoter proximal pausing on genes in metazoans. *Chromosoma* **118**, 1-10.
- Golic, K. and Lindquist, S. (1989). The FLP recombinase of yeast catalyzes site-specific recombination in the *Drosophila* genome. *Cell* **59**, 499-509.
- Gönczy, P. and DiNardo, S. (1996). The germ line regulates somatic cyst cell proliferation and fate during *Drosophila* spermatogenesis. *Development* **122**, 2437-2447.
- Gönczy, P., Matunis, E. and DiNardo, S. (1997). bag-of-marbles and benign gonial cell neoplasm act in the germline to restrict proliferation during *Drosophila* spermatogenesis. *Development* **124**, 4361-4371.
- Harrison, D. A., Gdula, D. A., Coyne, R. S. and Corces, V. G. (1993). A leucine zipper domain of the suppressor of Hairy-wing protein mediates its repressive effect on enhancer function. *Genes Dev.* **7**, 1966-1978.
- Hempel, L. U., Kalamegham, R., Smith, J. E., 3rd and Oliver, B. (2008). *Drosophila* germline sex determination: integration of germline autonomous cues and somatic signals. *Curr. Top. Dev. Biol.* **83**, 109-150.
- Honore, B., Baandrup, U., Nielsen, S. and Vorum, H. (2002). Endonuclein is a cell cycle regulated WD-repeat protein that is up-regulated in adenocarcinoma of the pancreas. *Oncogene* **21**, 1123-1129.
- Ivaldi, M. S., Karam, C. S. and Corces, V. G. (2007). Phosphorylation of histone H3 at Ser10 facilitates RNA polymerase II release from promoter-proximal pausing in *Drosophila*. *Genes Dev.* **21**, 2818-2831.
- Kawase, E., Wong, M. D., Ding, B. C. and Xie, T. (2004). Gbb/Bmp signaling is essential for maintaining germline stem cells and for repressing bam transcription in the *Drosophila* testis. *Development* **131**, 1365-1375.
- Kiger, A. A., Jones, D. L., Schulz, C., Rogers, M. B. and Fuller, M. T. (2001). Stem cell self-renewal specified by JAK-STAT activation in response to a support cell cue. *Science* **294**, 2542-2545.
- King, R. C. (1970). *Ovarian Development in Drosophila melanogaster*. New York: Academic Press.
- Kitadate, Y., Shigenobu, S., Arita, K. and Kobayashi, S. (2007). Boss/Sev signaling from germline to soma restricts germline-stem-cell-niche formation in the anterior region of *Drosophila* male gonads. *Dev. Cell* **13**, 151-159.
- Kwon, S. Y., Xiao, H., Wu, C. and Badenhorst, P. (2009). Alternative splicing of NURF301 generates distinct NURF chromatin remodeling complexes with altered modified histone binding specificities. *PLoS Genet.* **5**, e1000574.
- Le Bras, S. and Van Doren, M. (2006). Development of the male germline stem cell niche in *Drosophila*. *Dev. Biol.* **294**, 92-103.
- Leatherman, J. L. and Dinardo, S. (2008). Zfh-1 controls somatic stem cell self-renewal in the *Drosophila* testis and nonautonomously influences germline stem cell self-renewal. *Cell Stem Cell* **3**, 44-54.
- Leatherman, J. L. and Dinardo, S. (2010). Germline self-renewal requires cyst stem cells and stat regulates niche adhesion in *Drosophila* testes. *Nat. Cell Biol.* **12**, 806-811.
- Lehmann, R. and Tautz, D. (1994). RNA in situ hybridization. *Methods Cell Biol.* **44**, 567-598.
- McKearin, D. M. and Spradling, A. C. (1990). *bag-of-marbles*: a *Drosophila* gene required to initiate both male and female gametogenesis. *Genes Dev.* **4**, 2242-2251.
- Nystul, T. and Spradling, A. (2007). An epithelial niche in the *Drosophila* ovary undergoes long-range stem cell replacement. *Cell Stem Cell* **1**, 277-285.

- Patel, N. (1994). Imaging neuronal subsets and other cell types in whole-mount *Drosophila* embryos and larvae using antibody probes. *Methods Cell Biol.* **44**, 445-487.
- Pietersen, A. M. and van Lohuizen, M. (2008). Stem cell regulation by polycomb repressors: postponing commitment. *Curr. Opin. Cell Biol.* **20**, 201-207.
- Schulz, C., Kiger, A. A., Tazuke, S. I., Yamashita, Y. M., Pantalena-Filho, L. C., Jones, D. L., Wood, C. G. and Fuller, M. T. (2004). A misexpression screen reveals effects of bag-of-marbles and TGF beta class signaling on the *Drosophila* male germ-line stem cell lineage. *Genetics* **167**, 707-723.
- Scrima, A., Konickova, R., Czyzewski, B. K., Kawasaki, Y., Jeffrey, P. D., Groisman, R., Nakatani, Y., Iwai, S., Pavletich, N. P. and Thoma, N. H. (2008). Structural basis of UV DNA-damage recognition by the DDB1-DDB2 complex. *Cell* **135**, 1213-1223.
- Sheng, X. R., Posenau, T., Gumulak-Smith, J. J., Matunis, E., Van Doren, M. and Wawersik, M. (2009). Jak-STAT regulation of male germline stem cell establishment during *Drosophila* embryogenesis. *Dev. Biol.* **334**, 335-344.
- Shivdasani, A. A. and Ingham, P. W. (2003). Regulation of stem cell maintenance and transit amplifying cell proliferation by tgf-beta signaling in *Drosophila* spermatogenesis. *Curr. Biol.* **13**, 2065-2072.
- Song, X. and Xie, T. (2002). DE-cadherin-mediated cell adhesion is essential for maintaining somatic stem cells in the *Drosophila* ovary. *Proc. Natl. Acad. Sci. USA* **99**, 14813-14818.
- Spradling, A., Penman, S. and Pardue, M. L. (1975). Analysis of *drosophila* mRNA by in situ hybridization: sequences transcribed in normal and heat shocked cultured cells. *Cell* **4**, 395-404.
- Spradling, A. C. (1993). Developmental genetics of oogenesis. In *The Development of Drosophila melanogaster*, Vol. 1 (ed. M. Bate and A. Martinez Arias), pp. 1-70. Cold Spring Harbor: Cold Spring Harbor Press.
- Suka, N., Nakashima, E., Shinmyozu, K., Hidaka, M. and Jingami, H. (2006). The WD40-repeat protein Pwp1p associates in vivo with 25S ribosomal chromatin in a histone H4 tail-dependent manner. *Nucleic Acids Res.* **34**, 3555-3567.
- Tulina, N. and Matunis, E. (2001). Control of stem cell self-renewal in *Drosophila* spermatogenesis by JAK-STAT signaling. *Science* **294**, 2546-2549.
- Van Doren, M., Williamson, A. and Lehmann, R. (1998). Regulation of zygotic gene expression in *Drosophila* primordial germ cells. *Curr. Biol.* **8**, 243-246.
- Wang, K. C., Yang, Y. W., Liu, B., Sanyal, A., Corces-Zimmerman, R., Chen, Y., Lajoie, B. R., Protacio, A., Flynn, R. A., Gupta, R. A. et al. (2011). A long noncoding RNA maintains active chromatin to coordinate homeotic gene expression. *Nature* **472**, 120-124.
- Wawersik, M., Milutinovich, A., Casper, A. L., Matunis, E., Williams, B. and Van Doren, M. (2005). Somatic control of germline sexual development is mediated by the JAK/STAT pathway. *Nature* **436**, 563-567.
- Wysocka, J., Swigut, T., Xiao, H., Milne, T. A., Kwon, S. Y., Landry, J., Kauer, M., Tackett, A. J., Chait, B. T., Badenhorst, P. et al. (2006). A PHD finger of NURF couples histone H3 lysine 4 trimethylation with chromatin remodelling. *Nature* **442**, 86-90.
- Xi, R. and Xie, T. (2005). Stem cell self-renewal controlled by chromatin remodeling factors. *Science* **310**, 1487-1489.
- Xie, T. and Spradling, A. C. (1998). decapentaplegic is essential for the maintenance and division of germline stem cells in the *Drosophila* ovary. *Cell* **94**, 251-260.
- Yamashita, Y. M., Jones, D. L. and Fuller, M. T. (2003). Orientation of asymmetric stem cell division by the APC tumor suppressor and centrosome. *Science* **301**, 1547-1550.
- Zhu, C. H. and Xie, T. (2003). Clonal expansion of ovarian germline stem cells during niche formation in *Drosophila*. *Development* **130**, 2579-2588.
